# Supplementary material for: Insights into Xylan Degradation and Haloalkaline Adaptation through Whole-Genome Analysis of Alkalitalea saponilacus, an Anaerobic Haloalkaliphilic Bacterium Capable of Secreting Novel Halostable Xylanase
Source: MDPI journal article supplement (doi:10.3390/genes10010001), 2018-12-20
Supplement: s1 [file s1]

# **Insights into Xylan Degradation and Haloalkaline Adaptation through Whole-Genome Analysis of *Alkalitalea saponilacus*, an Anaerobic Haloalkaliphilic Bacterium Capable of Secreting Novel Halostable Xylanase**

Ziya Liao 1, Mark Holtzapple 2, Yanchun Yan 1, Haisheng Wang 1, Jun Li 3 and Baisuo Zhao 1,3,\*

1 Graduate School, Chinese Academy of Agricultural Sciences, Beijing 100081, China;

ziyaliao@163.com (Z.L.); yanyanchun@caas.cn (Y.Y.); wanghaisheng@caas.cn (H.W.)

2 Department of Chemical Engineering, Texas A&M University, College Station, TX 77843, USA;

m-holtzapple@mail.che.tamu.edu

3 Institute of Agricultural Resources and Regional Planning, Chinese Academy of Agricultural

Sciences, Beijing 100081, China; junli01@caas.cn

\* Correspondence: bszhao@live.com

Received: 30 October 2018; Accepted: 13 December 2018; Published: date

**Table S1.** Genome features of *Alkalitalea saponilacus* SC/BZ-SP2<sup>T</sup>.

| Features                          | Statistics |            |
|-----------------------------------|------------|------------|
|                                   | Value      | % of total |
| Length (bp)                       | 4,775,573  | 100.00     |
| G+C content (bp)                  | 1,875,544  | 39.27      |
| Coding region (bp)                | 4,118,672  | 86.24      |
| Total genes                       | 3,688      | 100.00     |
| Protein coding genes              | 3,626      | 98.32      |
| Pseudo genes                      | 57         | 1.55       |
| rRNA genes (5S, 16S, 2S)          | 4, 4, 4    | 0.33       |
| tRNA genes                        | 48         | 1.30       |
| ncRNA genes                       | 2          | 0.05       |
| Genes with function prediction    | 2,684      | 72.78      |
| Genes assigned to COGs            | 2225       | 60.33      |
| Protein coding genes with enzymes | 861        | 23.35      |

**Table S2.** Number of genes of *Alkalitalea saponilacus* associated with 23 general COG functional categories.

| Code                               | Value | % of total | Description                                                   |
|------------------------------------|-------|------------|---------------------------------------------------------------|
| Information storage and processing |       |            |                                                               |
| J                                  | 178   | 8.00       | Translation, ribosomal structure and biogenesis               |
| K                                  | 124   | 5.57       | Transcription                                                 |
| L                                  | 90    | 4.04       | Replication, recombination and repair                         |
| X                                  | 40    | 1.80       | Mobilome: prophages, transposons                              |
| Cellular processes and signaling   |       |            |                                                               |
| D                                  | 22    | 0.99       | Cell cycle control, cell division, chromosome partitioning    |
| M                                  | 200   | 8.99       | Cell wall/membrane/envelope biogenesis                        |
| N                                  | 32    | 1.44       | Cell motility                                                 |
| O                                  | 100   | 4.49       | Posttranslational modification, protein turnover, chaperones  |
| T                                  | 143   | 6.43       | Signal transduction mechanisms                                |
| U                                  | 22    | 0.99       | Intracellular trafficking, secretion, and vesicular transport |
| V                                  | 80    | 3.60       | Defense mechanisms                                            |
| W                                  | 5     | 0.22       | Extracellular structures                                      |
| Z                                  | 1     | 0.04       | Cytoskeleton                                                  |
| Metabolism                         |       |            |                                                               |
| C                                  | 126   | 5.66       | Energy production and conversion                              |
| E                                  | 159   | 7.15       | Amino acid transport and metabolism                           |
| F                                  | 70    | 3.15       | Nucleotide transport and metabolism                           |
| G                                  | 181   | 8.13       | Carbohydrate transport and metabolism                         |
| H                                  | 133   | 5.98       | Coenzyme transport and metabolism                             |
| I                                  | 81    | 3.64       | Lipid transport and metabolism                                |
| P                                  | 123   | 5.53       | Inorganic ion transport and metabolism                        |
| Q                                  | 28    | 1.26       | Secondary metabolites biosynthesis, transport and catabolism  |
| Poorly characterized               |       |            |                                                               |
| R                                  | 200   | 8.99       | General function prediction only                              |
| S                                  | 87    | 3.91       | Function unknown                                              |

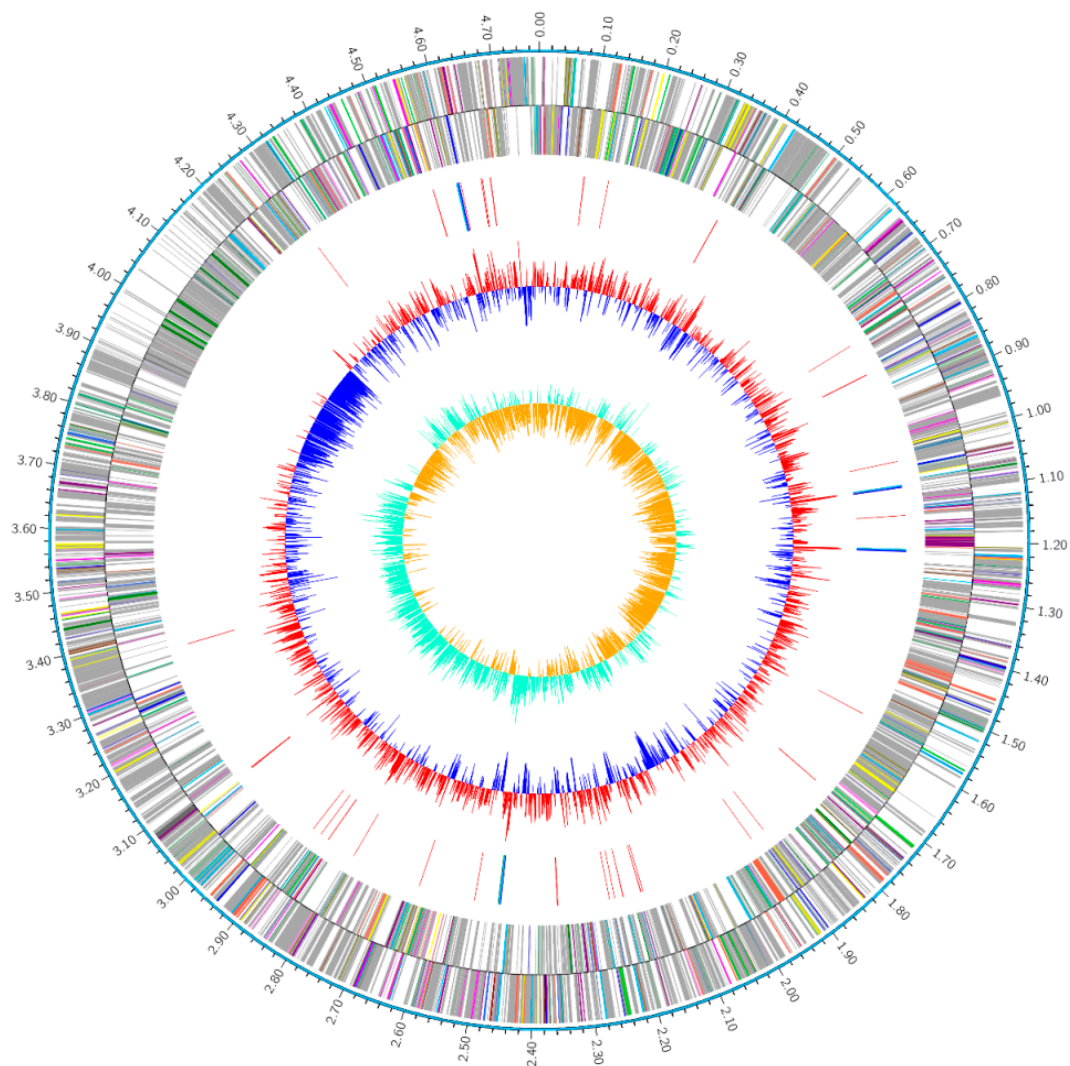

**Figure S1.** Circular genome map of *Alkalitalea saponilacus*. The outermost ring of the circle indicates the size of genome, in which each scale represents 0.5 Mb. The second and third laps illustrate CDSs, colored by COG function classification. The second is forward strand, and the third is backward strand. The fourth circle denotes rRNA and tRNA. The fifth circle is GC content, the red part indicates that GC content is higher than average, whereas the blue is lower. The higher peak value heralds the greater difference in average GC content. The innermost circle states the GC skew ( $G-C/G+C$ ). The plus-strand is more likely to transcribe CDS when the value is positive, yet minus strand tends to transcribe CDS when the value is negative.
